# Supplementary material for: Readily recyclable, high-performance thermosetting materials based on a lignin-derived spiro diacetal trigger
Source: Royal Society of Chemistry journal article supplement (doi:10.1039/c8ta07140c), 2018-12-05
Supplement: c8ta07140c1.pdf [file c8ta07140c1.pdf]

## Supporting Information

### Readily Recyclable, High-performance Thermosetting Materials based on a Lignin-derived Spiro Diacetal Trigger

Songqi Ma,<sup>1,\*</sup> Jingjing Wei,<sup>1,3</sup> Zhen Jia,<sup>1</sup> Tao Yu,<sup>2</sup> Wangchao Yuan,<sup>1</sup> Qiong Li,<sup>1</sup> Sheng Wang,<sup>1</sup> Shusen You,<sup>1</sup>  
Ren Liu,<sup>4</sup> Jin Zhu<sup>1,\*</sup>

<sup>1</sup> Key laboratory of bio-based polymeric materials technology and application of Zhejiang province, Ningbo Institute of Materials Technology and Engineering, Chinese Academy of Sciences, Ningbo 315201, P. R. China.

<sup>2</sup> School of Aerospace Engineering and Applied Mechanics, Tongji University, Shanghai 200082, P. R. China.

<sup>3</sup> School of Science, Northwestern Polytechnical University, Xi'an 710064, P. R. China.

<sup>4</sup> School of Chemical and Material Engineering, Jiangnan University, Wuxi 214122, P. R. China.

\*Corresponding authors: Songqi Ma (email: masongqi@nimte.ac.cn, Tel 86-0574-87619806; Fax 86-0574-86685186),  
Jin Zhu (email: jzhu@nimte.ac.cn).

### Contents

|                                                                                                                                                                   |    |
|-------------------------------------------------------------------------------------------------------------------------------------------------------------------|----|
| Synthesis, characterization, degradation of degradable diacrylate ( <b>6</b> ) .....                                                                              | 2  |
| Scheme S1. Synthetic route of degradable diacrylate <b>6</b> from <b>2</b> . .....                                                                                | 3  |
| Figure S1. FTIR spectrum of <b>2</b> . .....                                                                                                                      | 4  |
| Figure S2. FTIR spectrum of <b>3</b> . .....                                                                                                                      | 5  |
| Figure S3. FTIR spectrum of <b>5</b> . .....                                                                                                                      | 6  |
| Figure S4. TOF-MS spectrum of <b>2</b> . .....                                                                                                                    | 7  |
| Figure S5. TOF-MS spectrum of <b>3</b> . .....                                                                                                                    | 8  |
| Figure S6. TOF-MS spectrum of <b>5</b> . .....                                                                                                                    | 9  |
| Figure S7. <sup>1</sup> H NMR spectrum of <b>6</b> . .....                                                                                                        | 10 |
| Figure S8. <sup>13</sup> C NMR spectrum of <b>6</b> . .....                                                                                                       | 11 |
| Figure S9. FTIR spectrum of <b>6</b> . .....                                                                                                                      | 12 |
| Figure S10. TOF-MS spectrum of <b>6</b> . .....                                                                                                                   | 13 |
| Figure S11. <sup>1</sup> H NMR spectrum of the DDM cured <b>3</b> immersed in 0.1 M HCl solution (acetone/H <sub>2</sub> O = 9/1, v/v) at 50 °C for 120 min. .... | 14 |
| Figure S12. Tensile stress-strain curves of the cured <b>3</b> . .....                                                                                            | 15 |
| Figure S13. Tensile stress-strain curves of the cured <b>4</b> . .....                                                                                            | 16 |
| Figure S14. Appearance of the cured <b>6</b> before and after immersing in 1 M HCl solution (THF/H <sub>2</sub> O=9/1, v/v). ....                                 | 17 |
| Figure S15. Tensile stress-strain curves of the cured <b>5</b> . .....                                                                                            | 18 |

|                                                                                                                           |    |
|---------------------------------------------------------------------------------------------------------------------------|----|
| Figure S16. DMA curves of the cured <b>5</b> .....                                                                        | 19 |
| Figure S17. The removing process of coating on slide glass with 0.1 M HCl solution (acetone/H <sub>2</sub> O=9/1, v/v).20 |    |
| Table S1. The coating properties of coatings based on <b>3</b> and <b>4</b> .....                                         | 21 |

## Synthesis, characterization, degradation of degradable diacrylate (**6**)

**6** was synthesized through acylation reaction between aromatic hydroxyl group of **2** and acrylylchloride. 5 g of **2**, 10 g of anhydrous potassium carbonate (K<sub>2</sub>CO<sub>3</sub>) and 2.88 g of triethylamine (Et<sub>3</sub>N) as the acid-binding agents, 20 mL of dichloromethane (CH<sub>2</sub>Cl<sub>2</sub>) as the solvent were placed in a round-bottom flask equipped with a constant pressure funnel and a magnetic stirrer, and solution of 6 mL acrylylchloride and 15 mL dichloromethane was added dropwise and reacted at 16 °C for 2 h, then heated to 38 °C and reacted for 2 h. The mixture was washed with purified water after being filtrated and dried with anhydrous magnesium sulfate, and 5.4 g of while solid **6** with the yield of 85.2 % was obtained by precipitation with petroleum ether, repeating the process of dissolving with dichloromethane and precipitation with petroleum ether three times, and vacuum drying at 60 °C for 5 h. The synthetic route is shown in Scheme S1. <sup>1</sup>H NMR and <sup>13</sup>C NMR spectra of **6** were recorded by an AVANCE III Bruker NMR spectrometer (Bruker, Switzerland) with DMSO-d<sub>6</sub> as solvent, as shown in Figure S7 and S8. FTIR spectrum was examined by a NICOLET 6700 FTIR (NICOLET, America) through the KBr pellet method (Figure S9). TOF-MS spectrum was measured by TripleTOF 4600 Time of Flight Mass Spectrometer (AB Sciex, America) under positive mode using DMSO as the solvent (Figure S10). For the cured **6**, 0.2 g of **6**, 0.3 g of styrene, 1.1 g of butyl methacrylate, 0.4 g of hydroxyethyl methacrylate, and 0.15g of dibenzoyl peroxide were mixed and cured at 80 °C for 2.5h and 140 °C for 2 h. The cured **6** (small particles) with the weight of about 80 mg were immersed in vials with 10 mL 1 M HCl solution (THF/H<sub>2</sub>O=9/1, v/v). Within 2 h, the cured **6** could be completely dissolved in 1 M HCl solution (THF /H<sub>2</sub>O = 9/1, v/v) at 50 °C (Fig. S14)

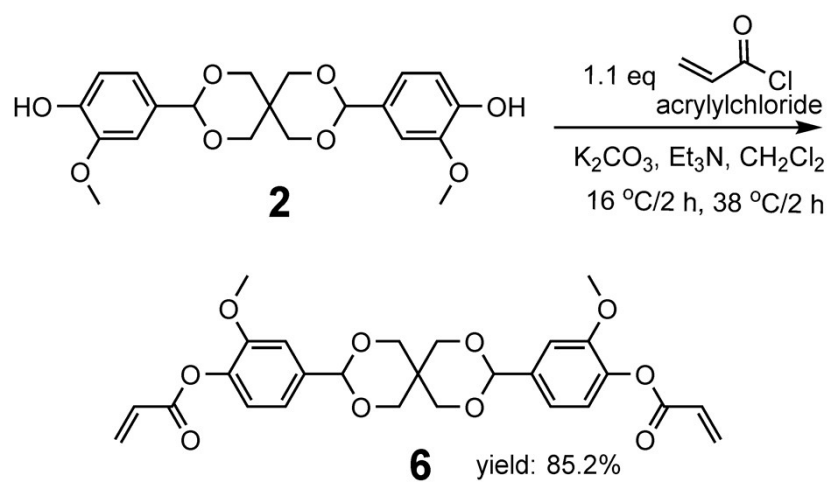

**Scheme S1. Synthetic route of degradable diacrylate **6** from **2**.**

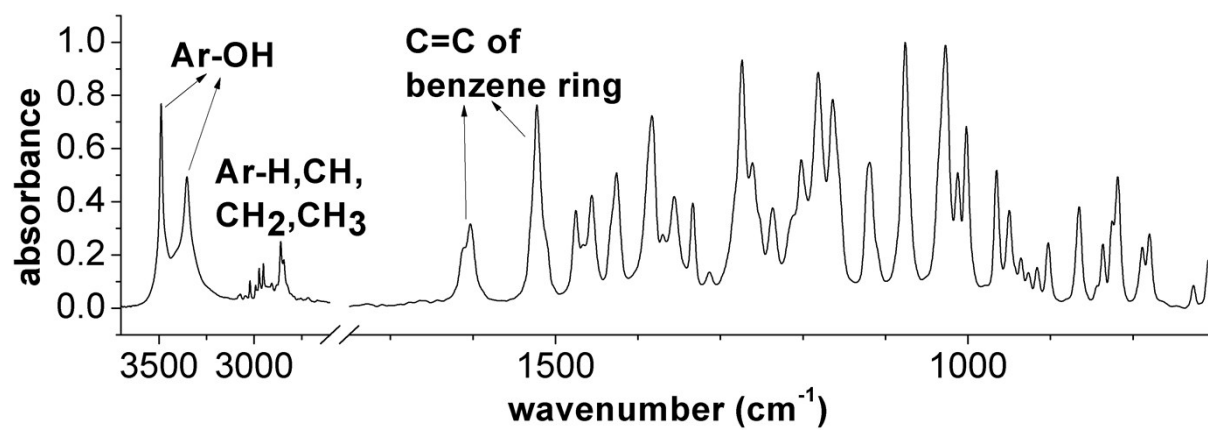

Figure S1. FTIR spectrum of **2**.

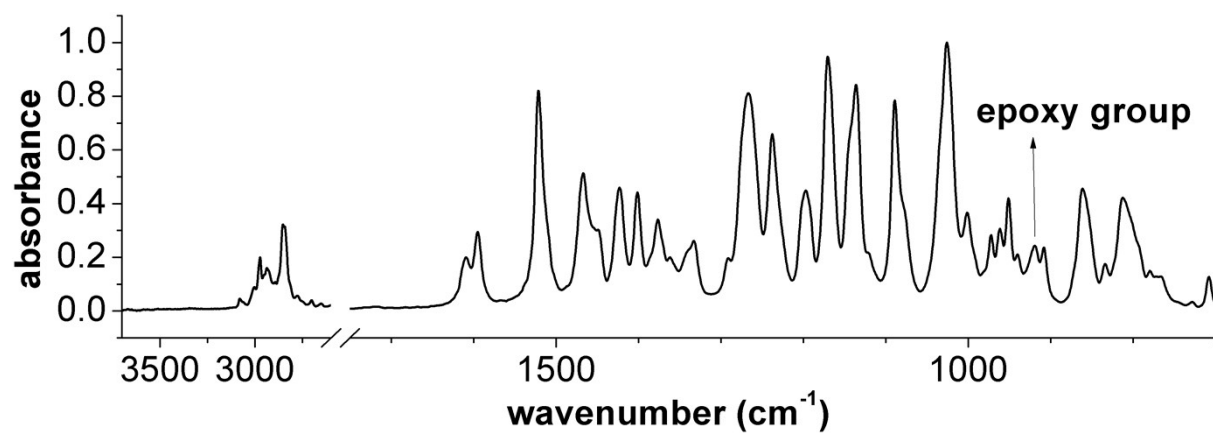

**Figure S2. FTIR spectrum of **3**.**

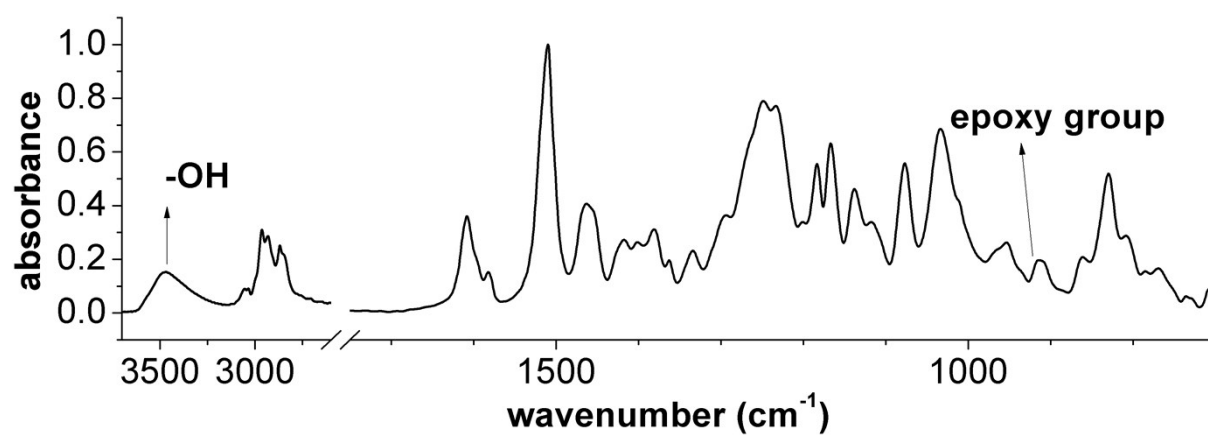

**Figure S3. FTIR spectrum of **5**.**

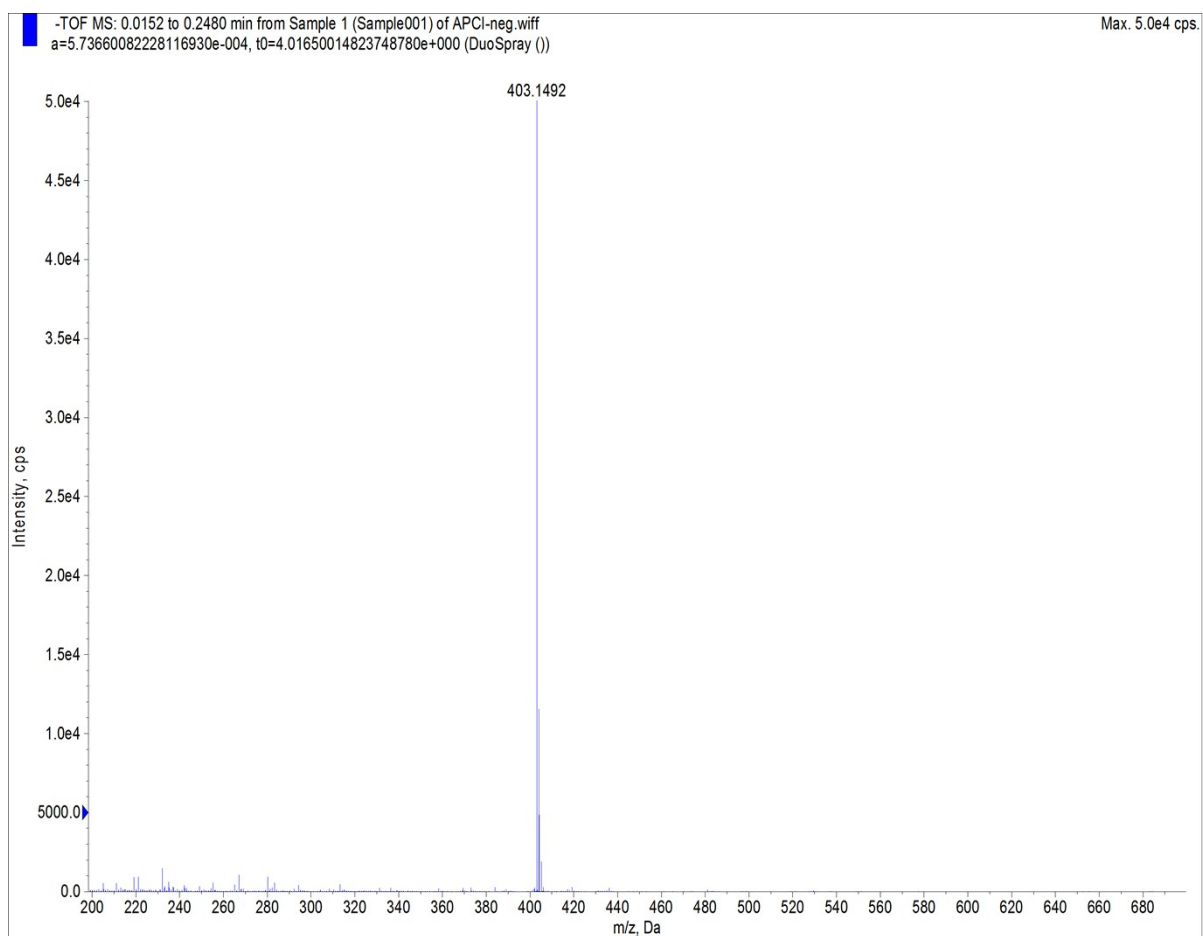

**Figure S4. TOF-MS spectrum of **2**.**

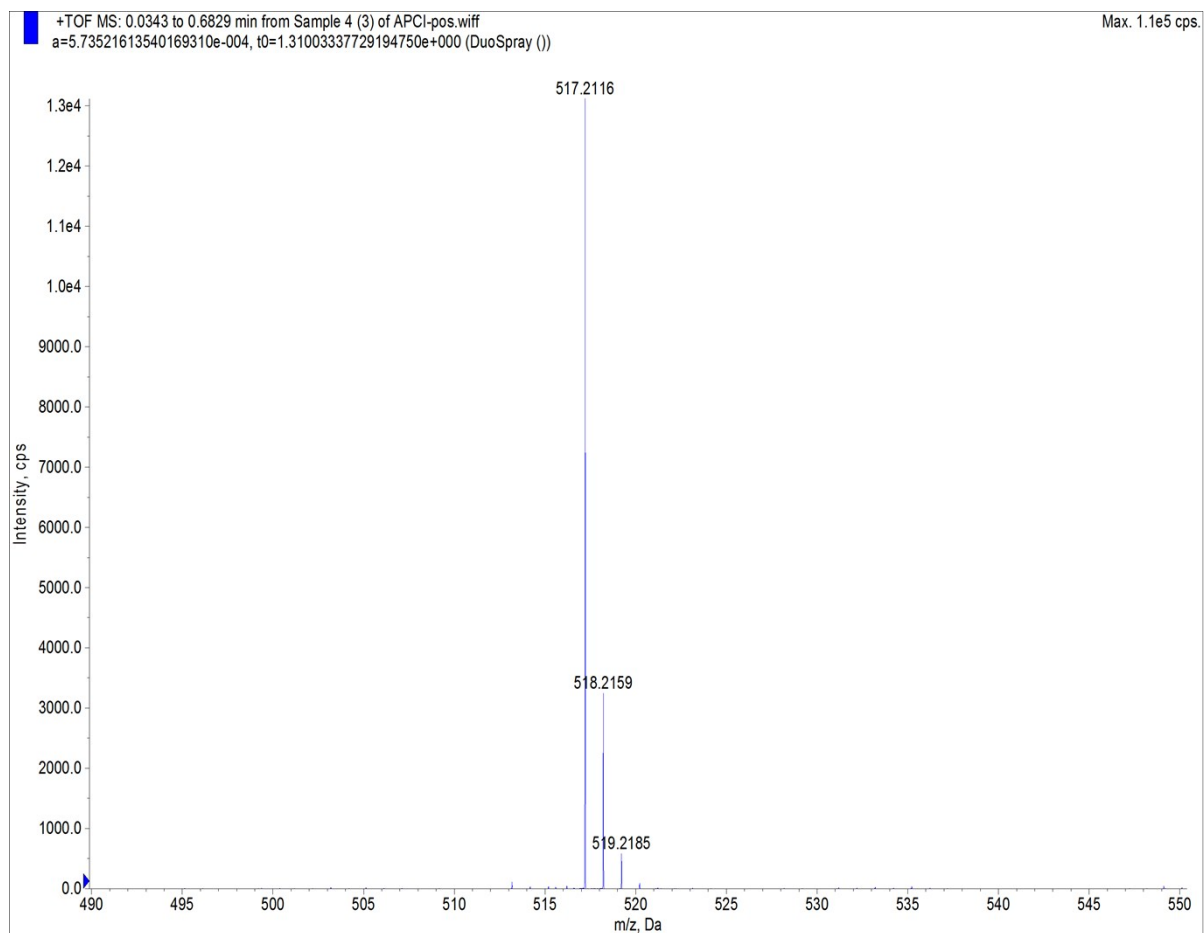

**Figure S5. TOF-MS spectrum of 3.**



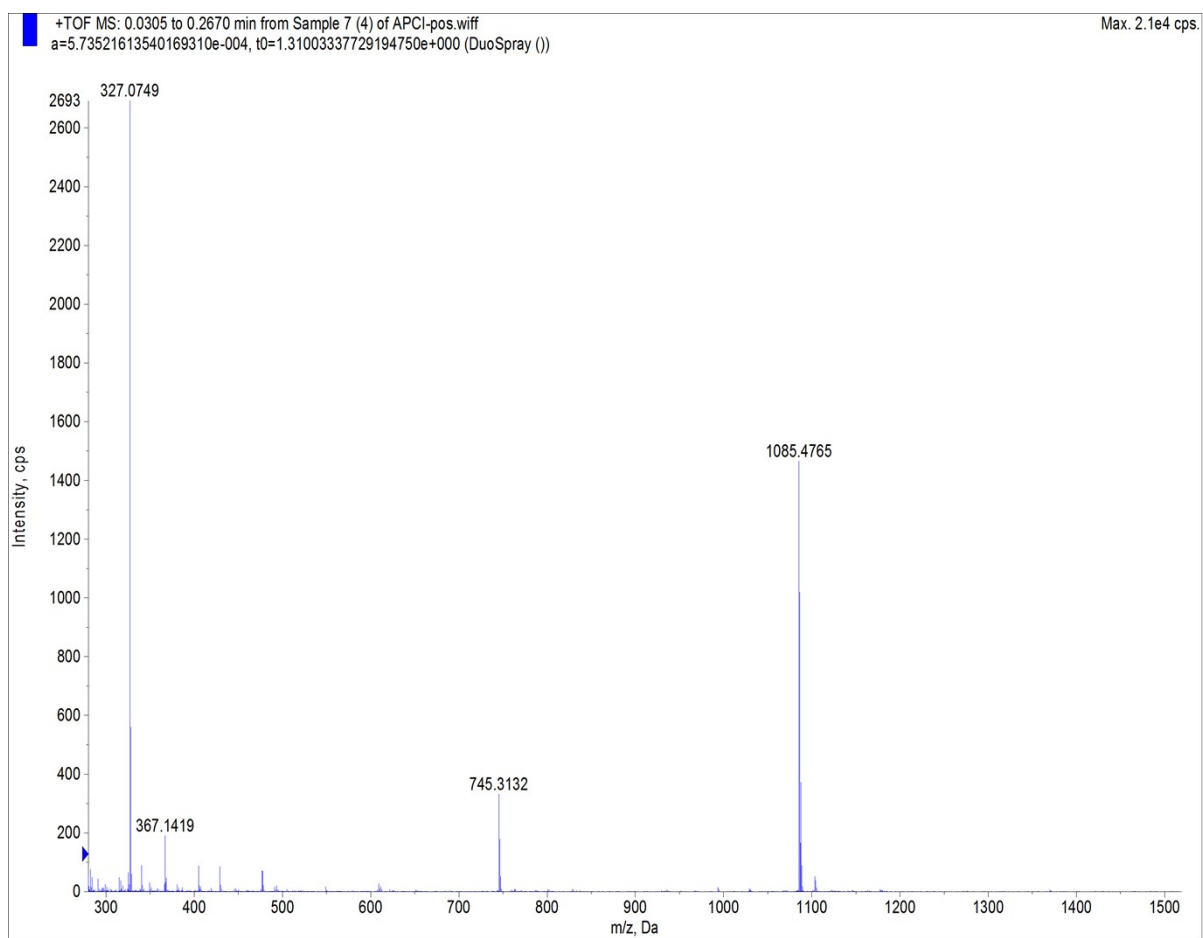

**Figure S6. TOF-MS spectrum of 5.**

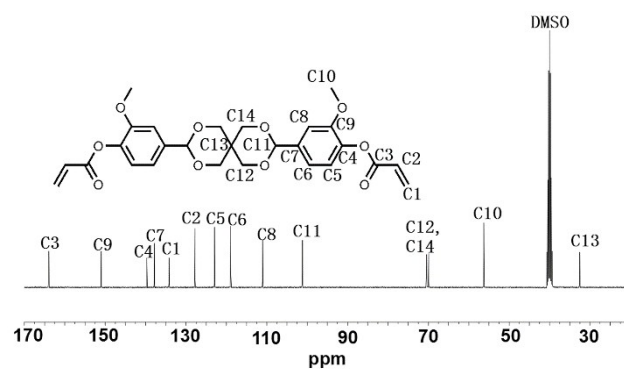

**Figure S7.  $^1\text{H}$  NMR spectrum of **6**.**

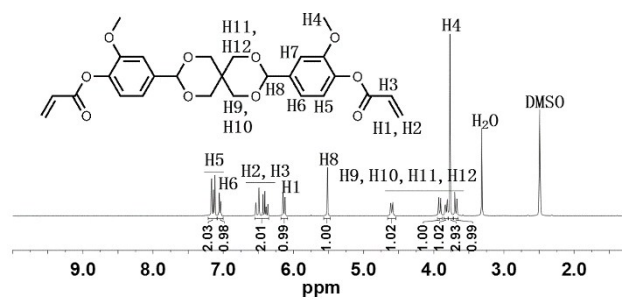

**Figure S8.**  $^{13}\text{C}$  NMR spectrum of **6**.

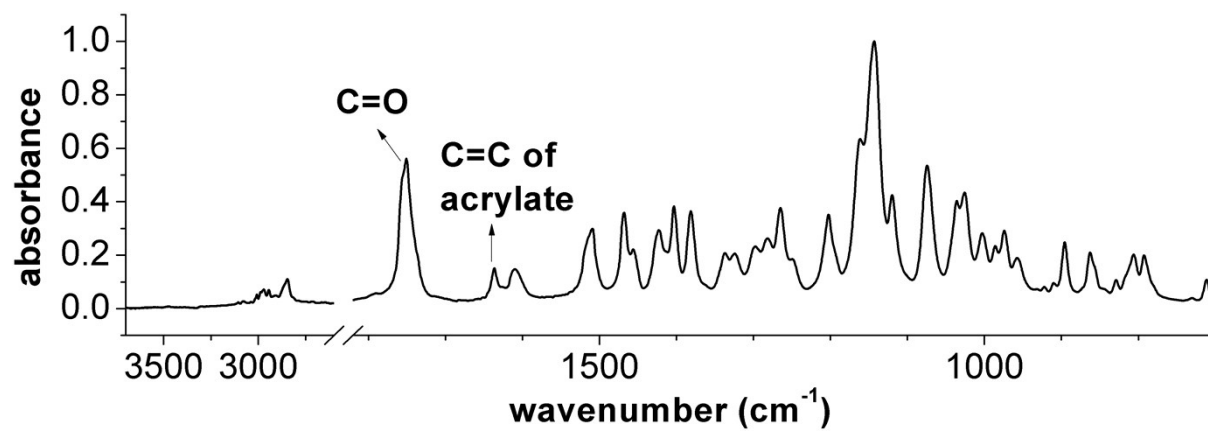

**Figure S9. FTIR spectrum of **6**.**

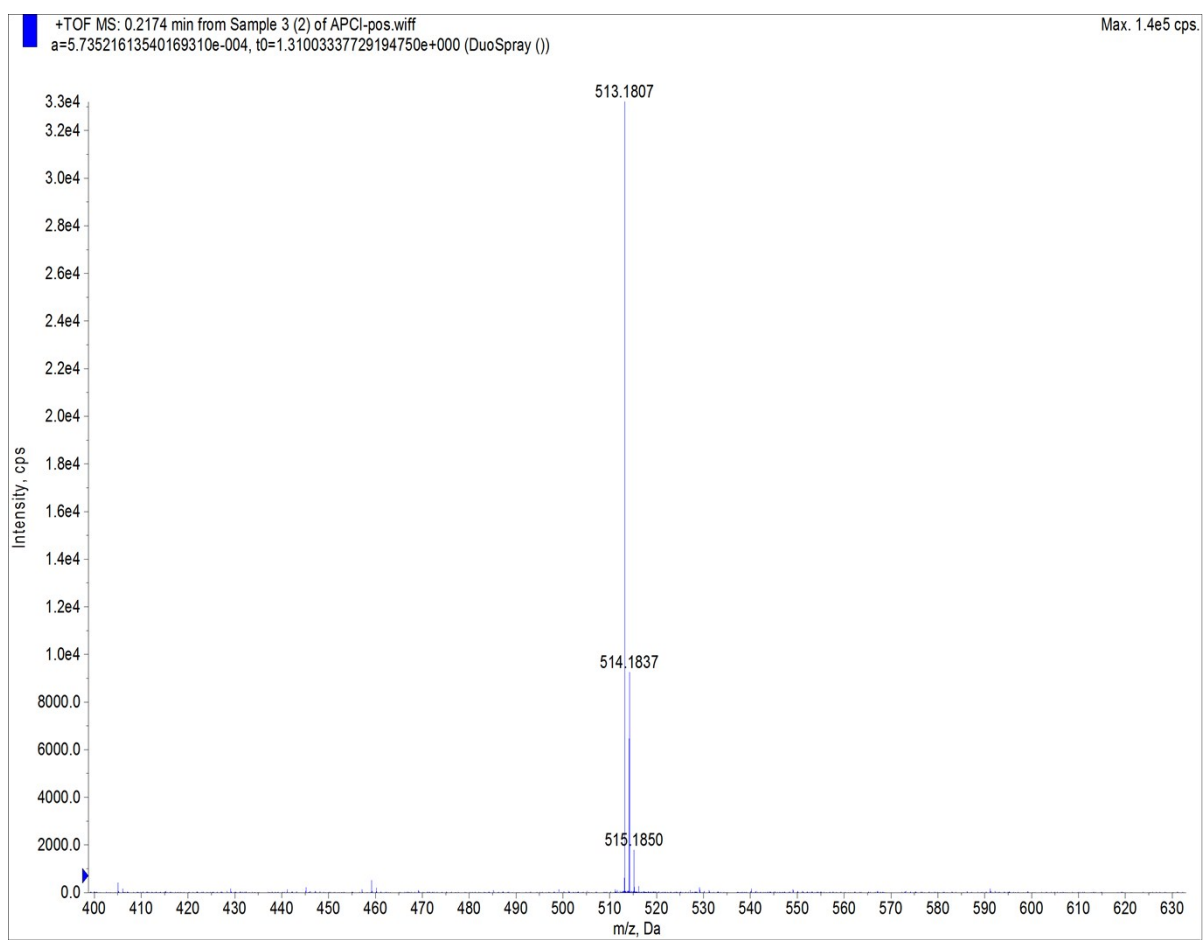

**Figure S10. TOF-MS spectrum of **6**.**

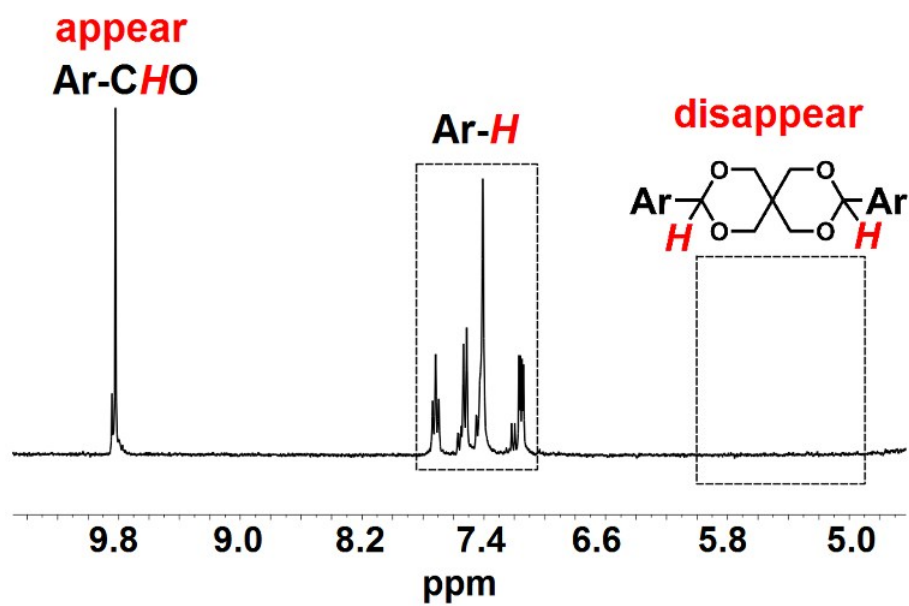

**Figure S11.**  $^1\text{H}$  NMR spectrum of the DDM cured **3** immersed in 0.1 M HCl solution (acetone/ $\text{H}_2\text{O}$  = 9/1, v/v) at 50 °C for 120 min.

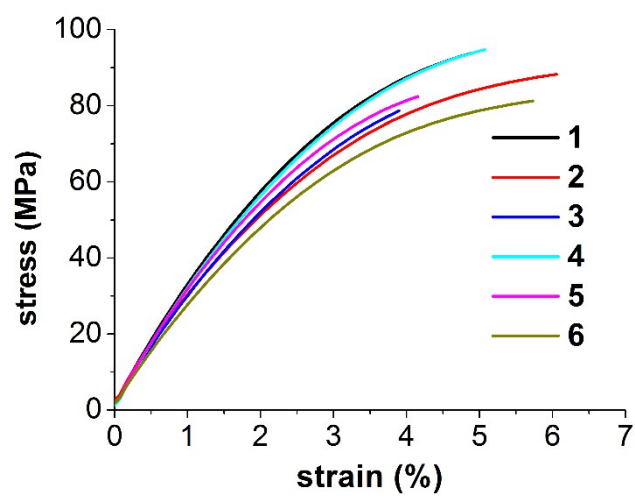

**Figure S12.** Tensile stress-strain curves of the cured **3**.

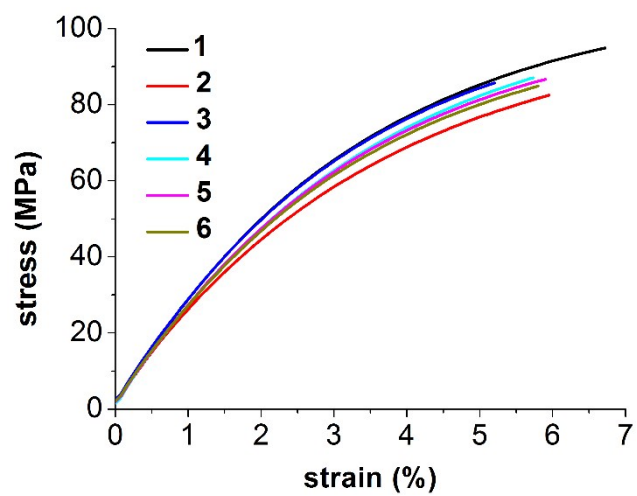

**Figure S13.** Tensile stress-strain curves of the cured **4**.



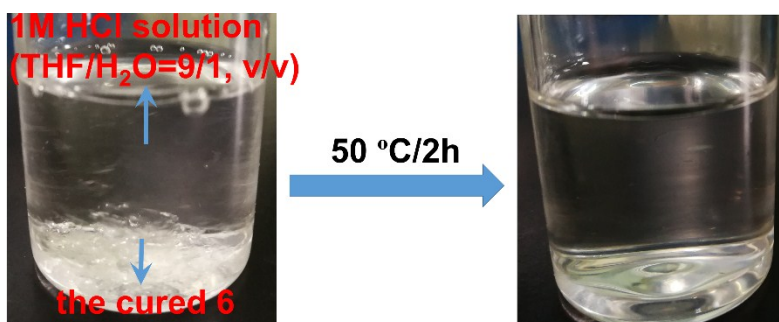

**Figure S14.** Appearance of the cured **6** before and after immersing in 1 M HCl solution (THF/H<sub>2</sub>O=9/1, v/v).

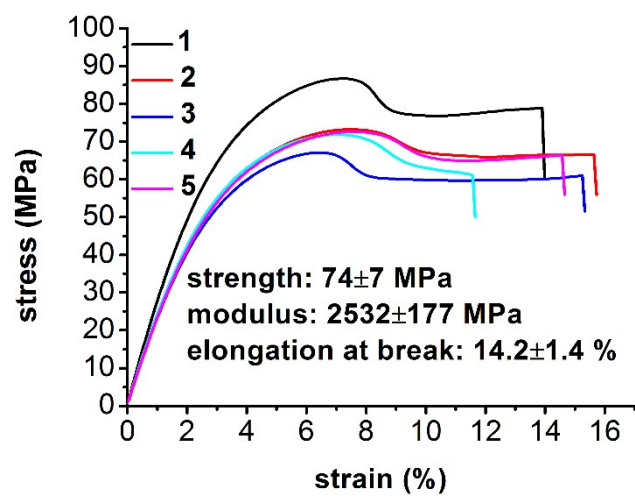

**Figure S15.** Tensile stress-strain curves of the cured **5**.

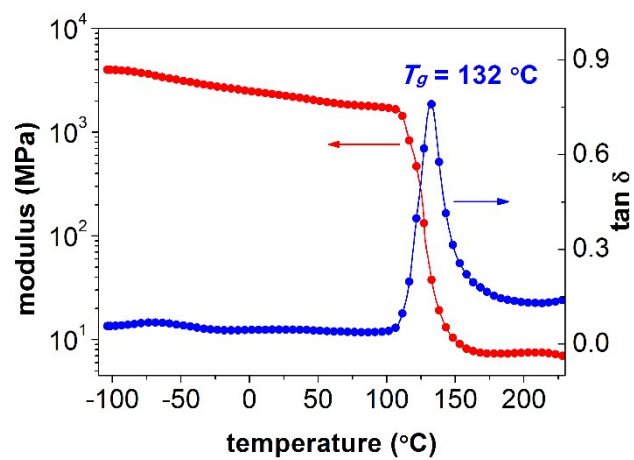

**Figure S16.** DMA curves of the cured **5**.

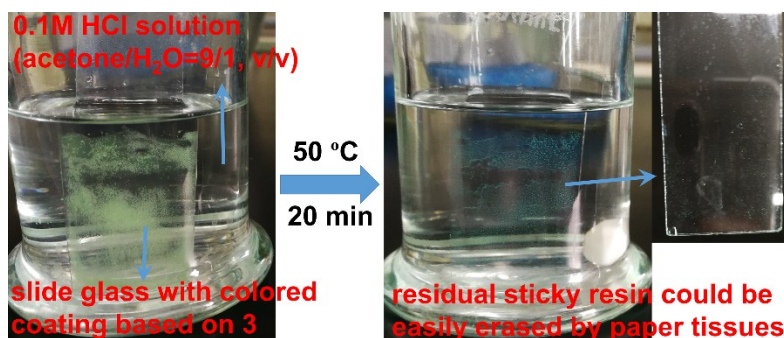

**Figure S17.** The removing process of coating on slide glass with 0.1 M HCl solution (acetone/H<sub>2</sub>O=9/1, v/v).

**Table S1.** The coating properties of coatings based on **3** and **4**.

| sample                    | thickness<br>( $\mu\text{m}$ ) | pencil hardness |         | MEK         | mandrel                   | bending |
|---------------------------|--------------------------------|-----------------|---------|-------------|---------------------------|---------|
|                           |                                | gouge           | scratch | double rubs | (elongation at break) (%) |         |
| coating based on <b>3</b> | $61 \pm 2$                     | 6H              | 3H      | >400        | >28                       |         |
| coating based on <b>4</b> | $58 \pm 3$                     | 5H              | 2H      | >400        | >28                       |         |
